# Supplementary material
Source: MDPI journal article supplement (https://www.mdpi.com/2076-3921/12/3/706)
Supplement: s1 [file s1]

Archive with 1 entries (1 files):
- antioxidants-2236835-supplementary.pdf
